# Supplementary material for: N-doped pinecone-based carbon with a hierarchical porous pie-like structure: a long-cycle-life anode material for potassium-ion batteries
Source: Royal Society of Chemistry journal article supplement (doi:10.1039/d2ra03205h), 2022-01-01
Supplement: d2ra03205h1.pdf [file d2ra03205h1.pdf]

Supplementary data

**N-doped pinecone-based carbon with hierarchical porous pie-like structure: A long-cycle-life anode material for potassium-ion batteries**

Jian-Fang Lu<sup>a b</sup>, Ke-Chun Li<sup>c</sup>, Xiao-Yan Lv<sup>d</sup>, Fu-Hou Lei<sup>b</sup>, Yan Mi<sup>b</sup>,

Yan-Xuan Wen<sup>a e\*</sup>,

<sup>a</sup>School of Chemistry and Chemical Engineering, Guangxi University, Nanning 530004, Guangxi, China.

<sup>b</sup>School of Chemistry and Chemical Engineering, Guangxi MINZU University, Nanning 530006, Guangxi, China.

<sup>c</sup>School of Materials and Environment, Guangxi MINZU University, Nanning 530006, Guangxi, China.

<sup>d</sup>The New Rural Development Research Institute, Guangxi University, Guangxi University, Nanning 530004, Guangxi, China.

<sup>e</sup>Guangxi Key Laboratory of Processing for Non-ferrous Metallic and Featured Materials, Guangxi University, Nanning 530004, Guangxi, China.

---

\* Corresponding author. School of Chemistry and Chemical Engineering, Guangxi University, Nanning 530004, Guangxi, China.  
E-mail address: wenyaxuan@vip.163.com (X.Y. Wen).

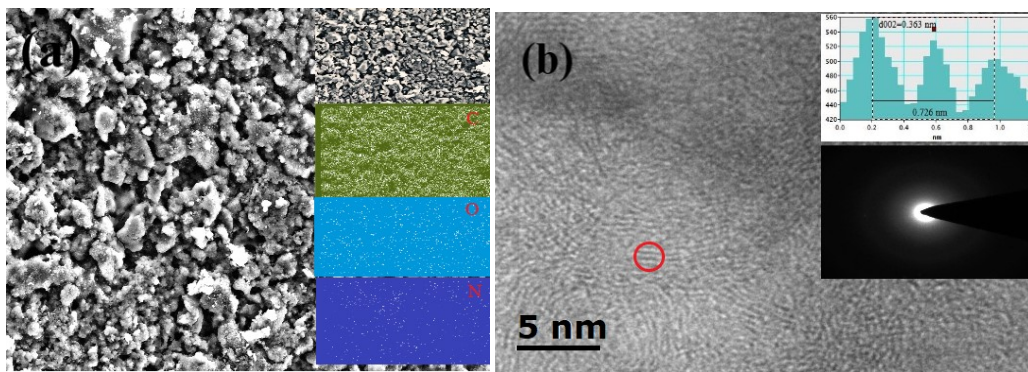

Figure S1. (a) element mapping of PC and (b) high-resolution TEM images of PC

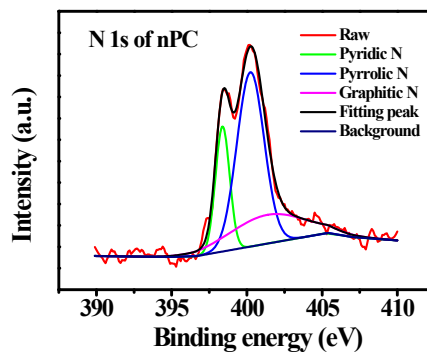

Figure S2. High-resolution N 1s spectra of NPC.

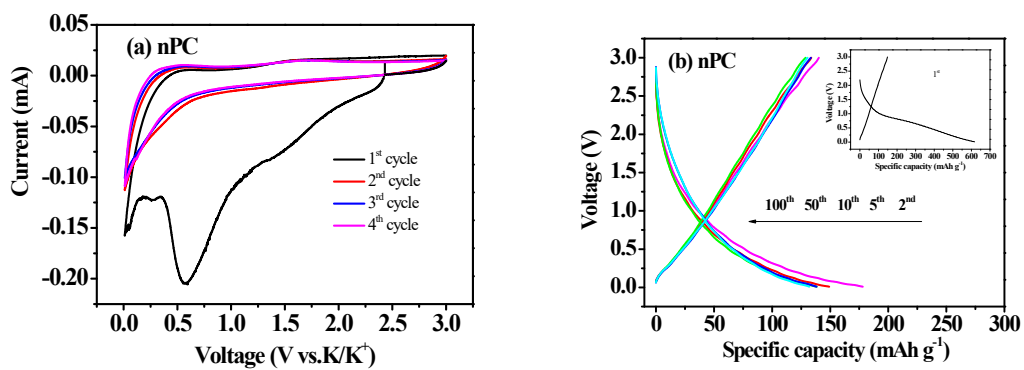

Figure S3. Electrochemical performance of nitrogen-doped without  $\text{ZnCl}_2$  (nPC) pinecone-based carbon: (a) cyclic-voltammetry curves at  $0.1 \text{ mV s}^{-1}$  (b) galvanostatic charge/discharge profiles of first cycle at  $50 \text{ mA g}^{-1}$

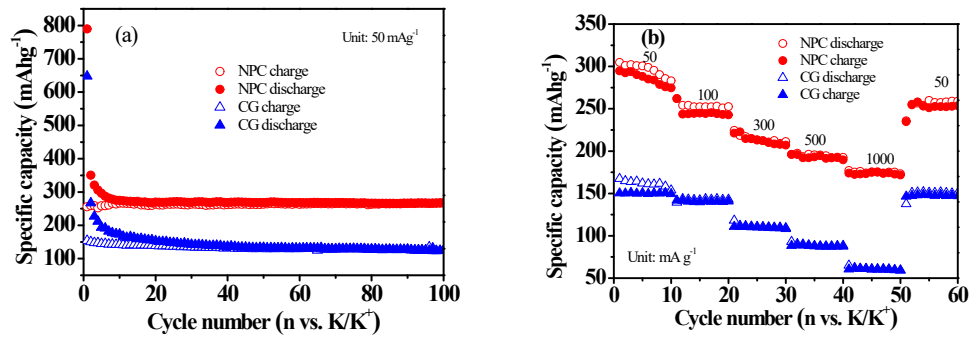

Figure S4. Electrochemical performances of commercial graphite (CG) and nitrogen-doped pinecone-based carbon (NPC): (a) cycle stability at 50 mA g<sup>-1</sup>; (b) rate performance.

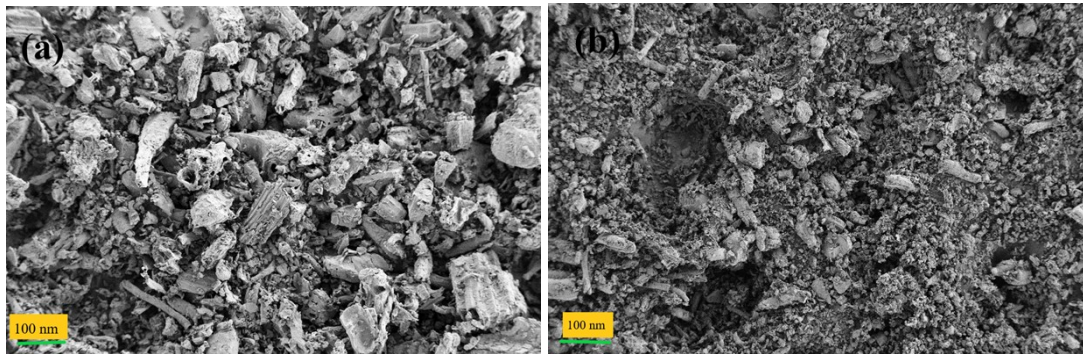

Figure S5. (a) SEM images of nPC in the fresh state and (b) in the 1000<sup>th</sup> cycle.
